# Supplementary material for: Towards understanding non-equivalence of α and β subunits within human hemoglobin in conformational relaxation and molecular oxygen rebinding
Source: Royal Society of Chemistry journal article supplement (doi:10.1039/d1sc00712b), 2021-01-01

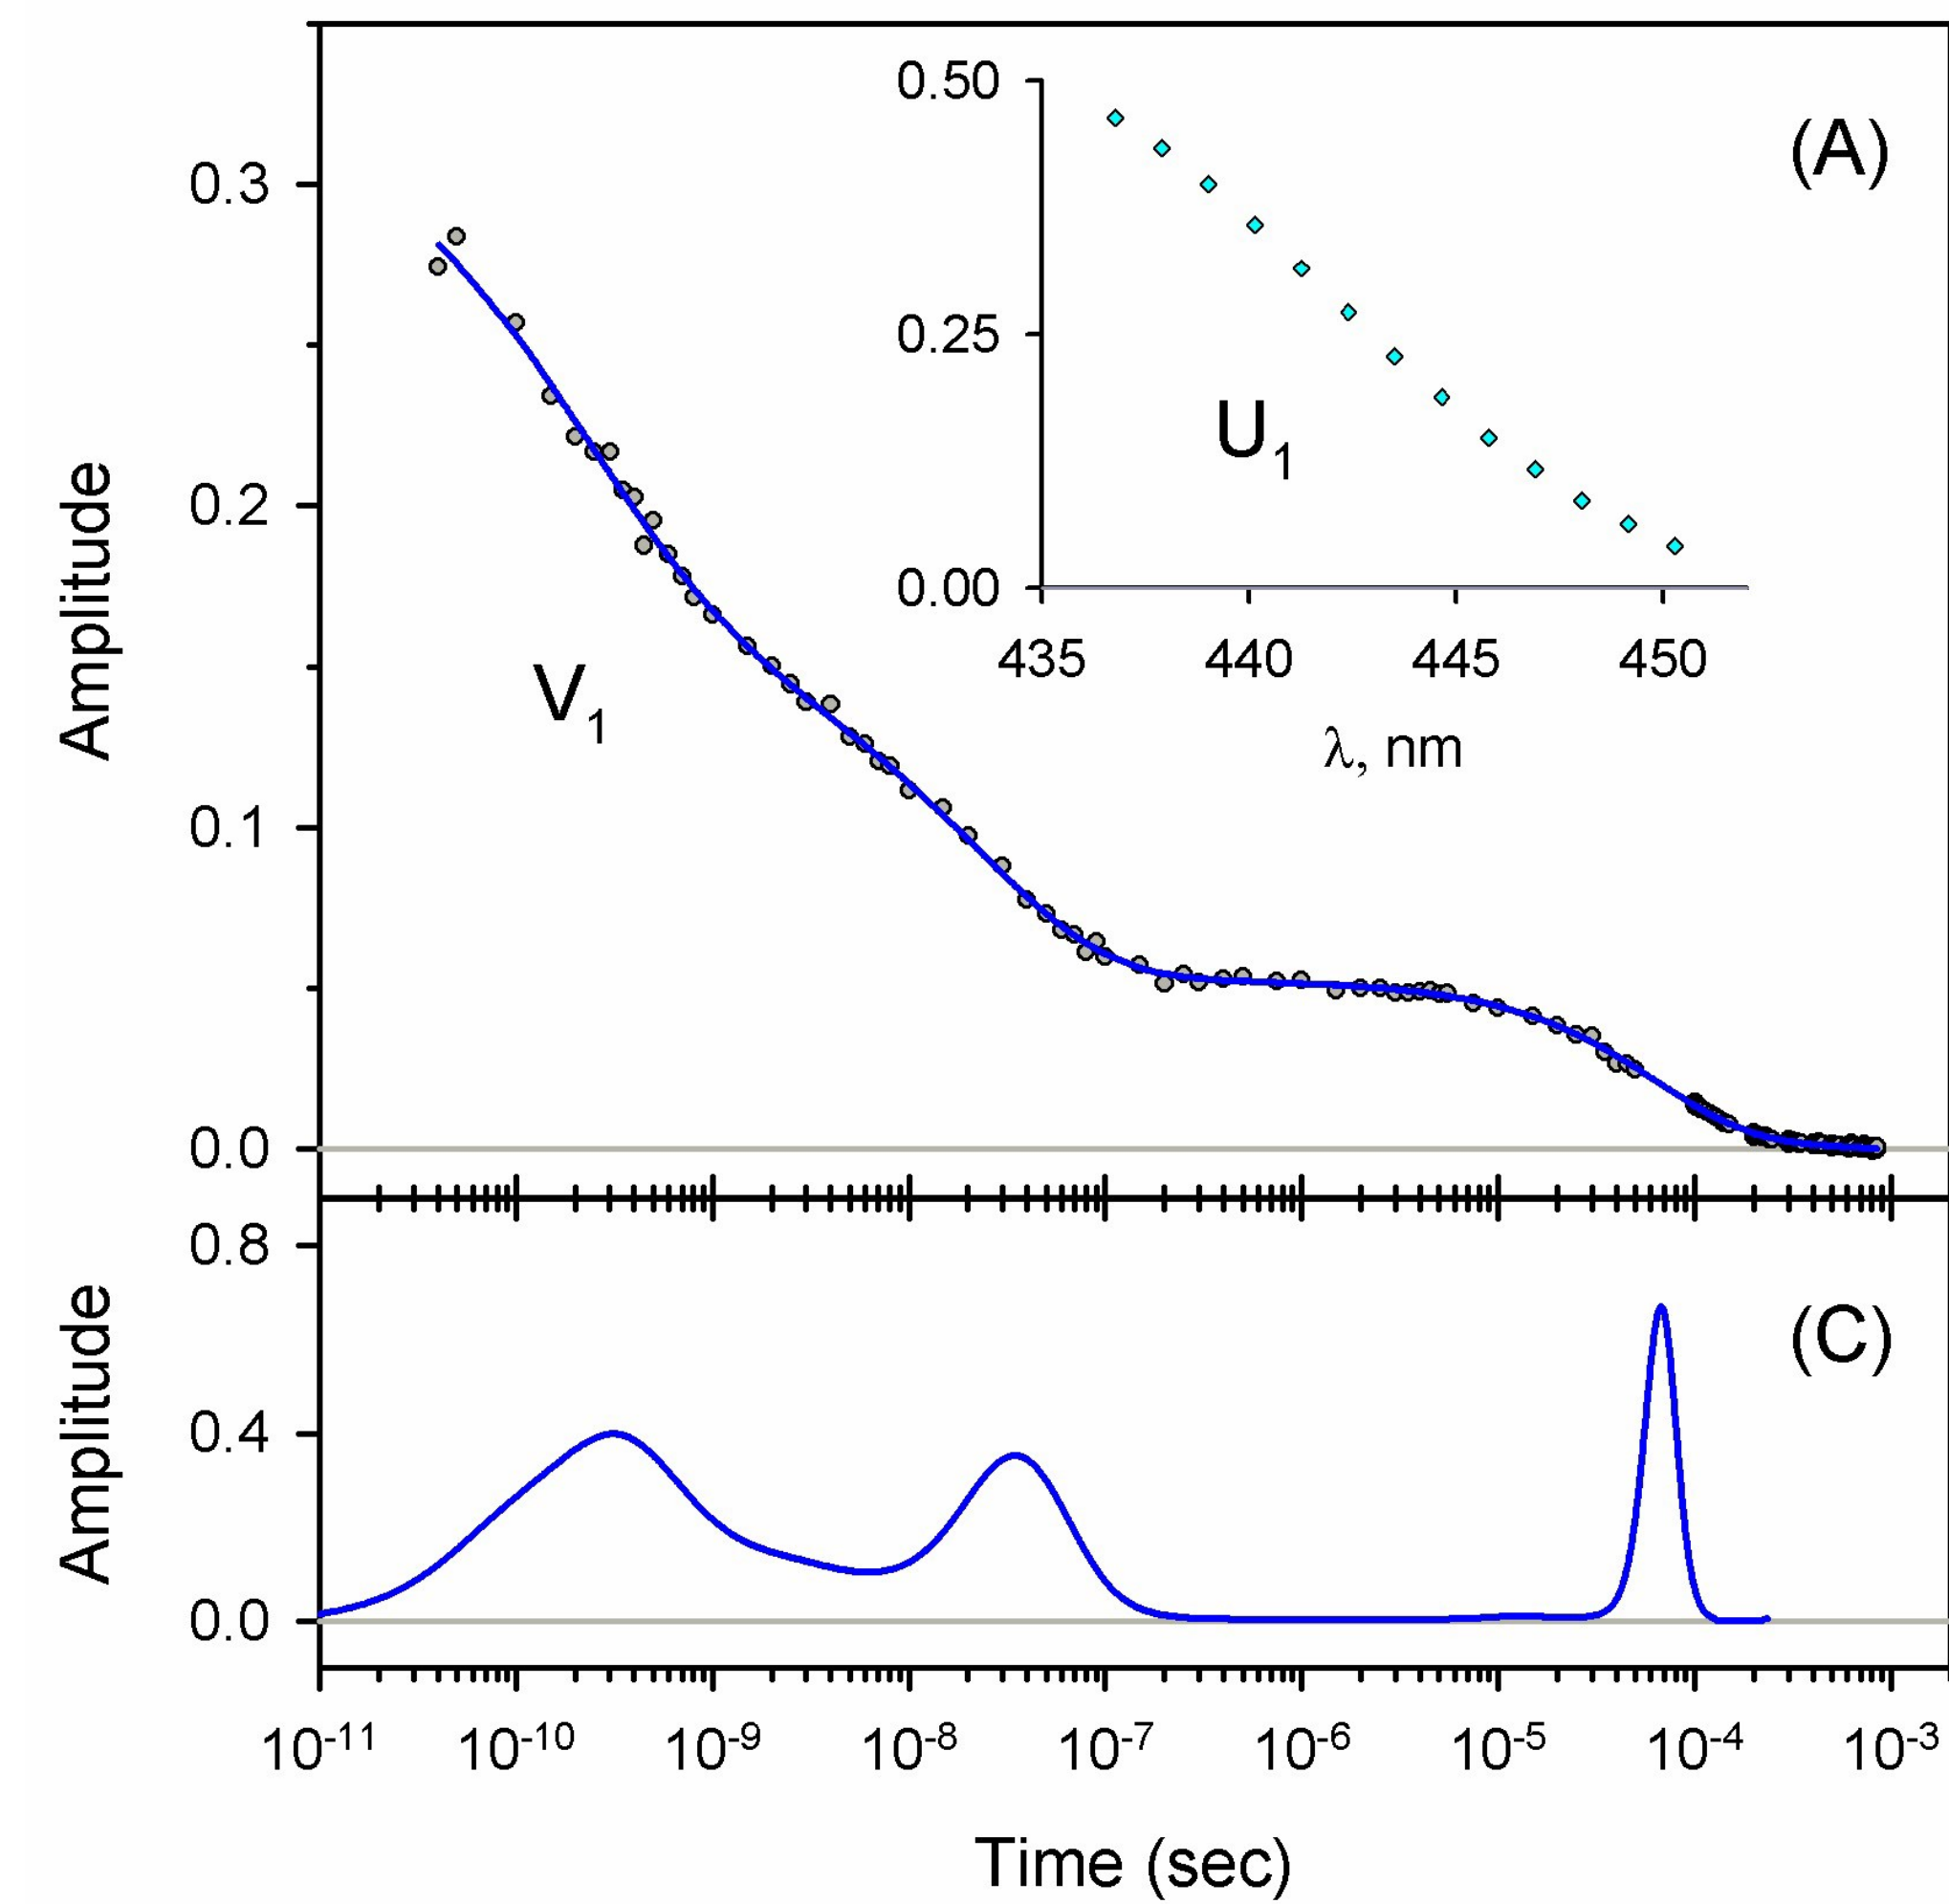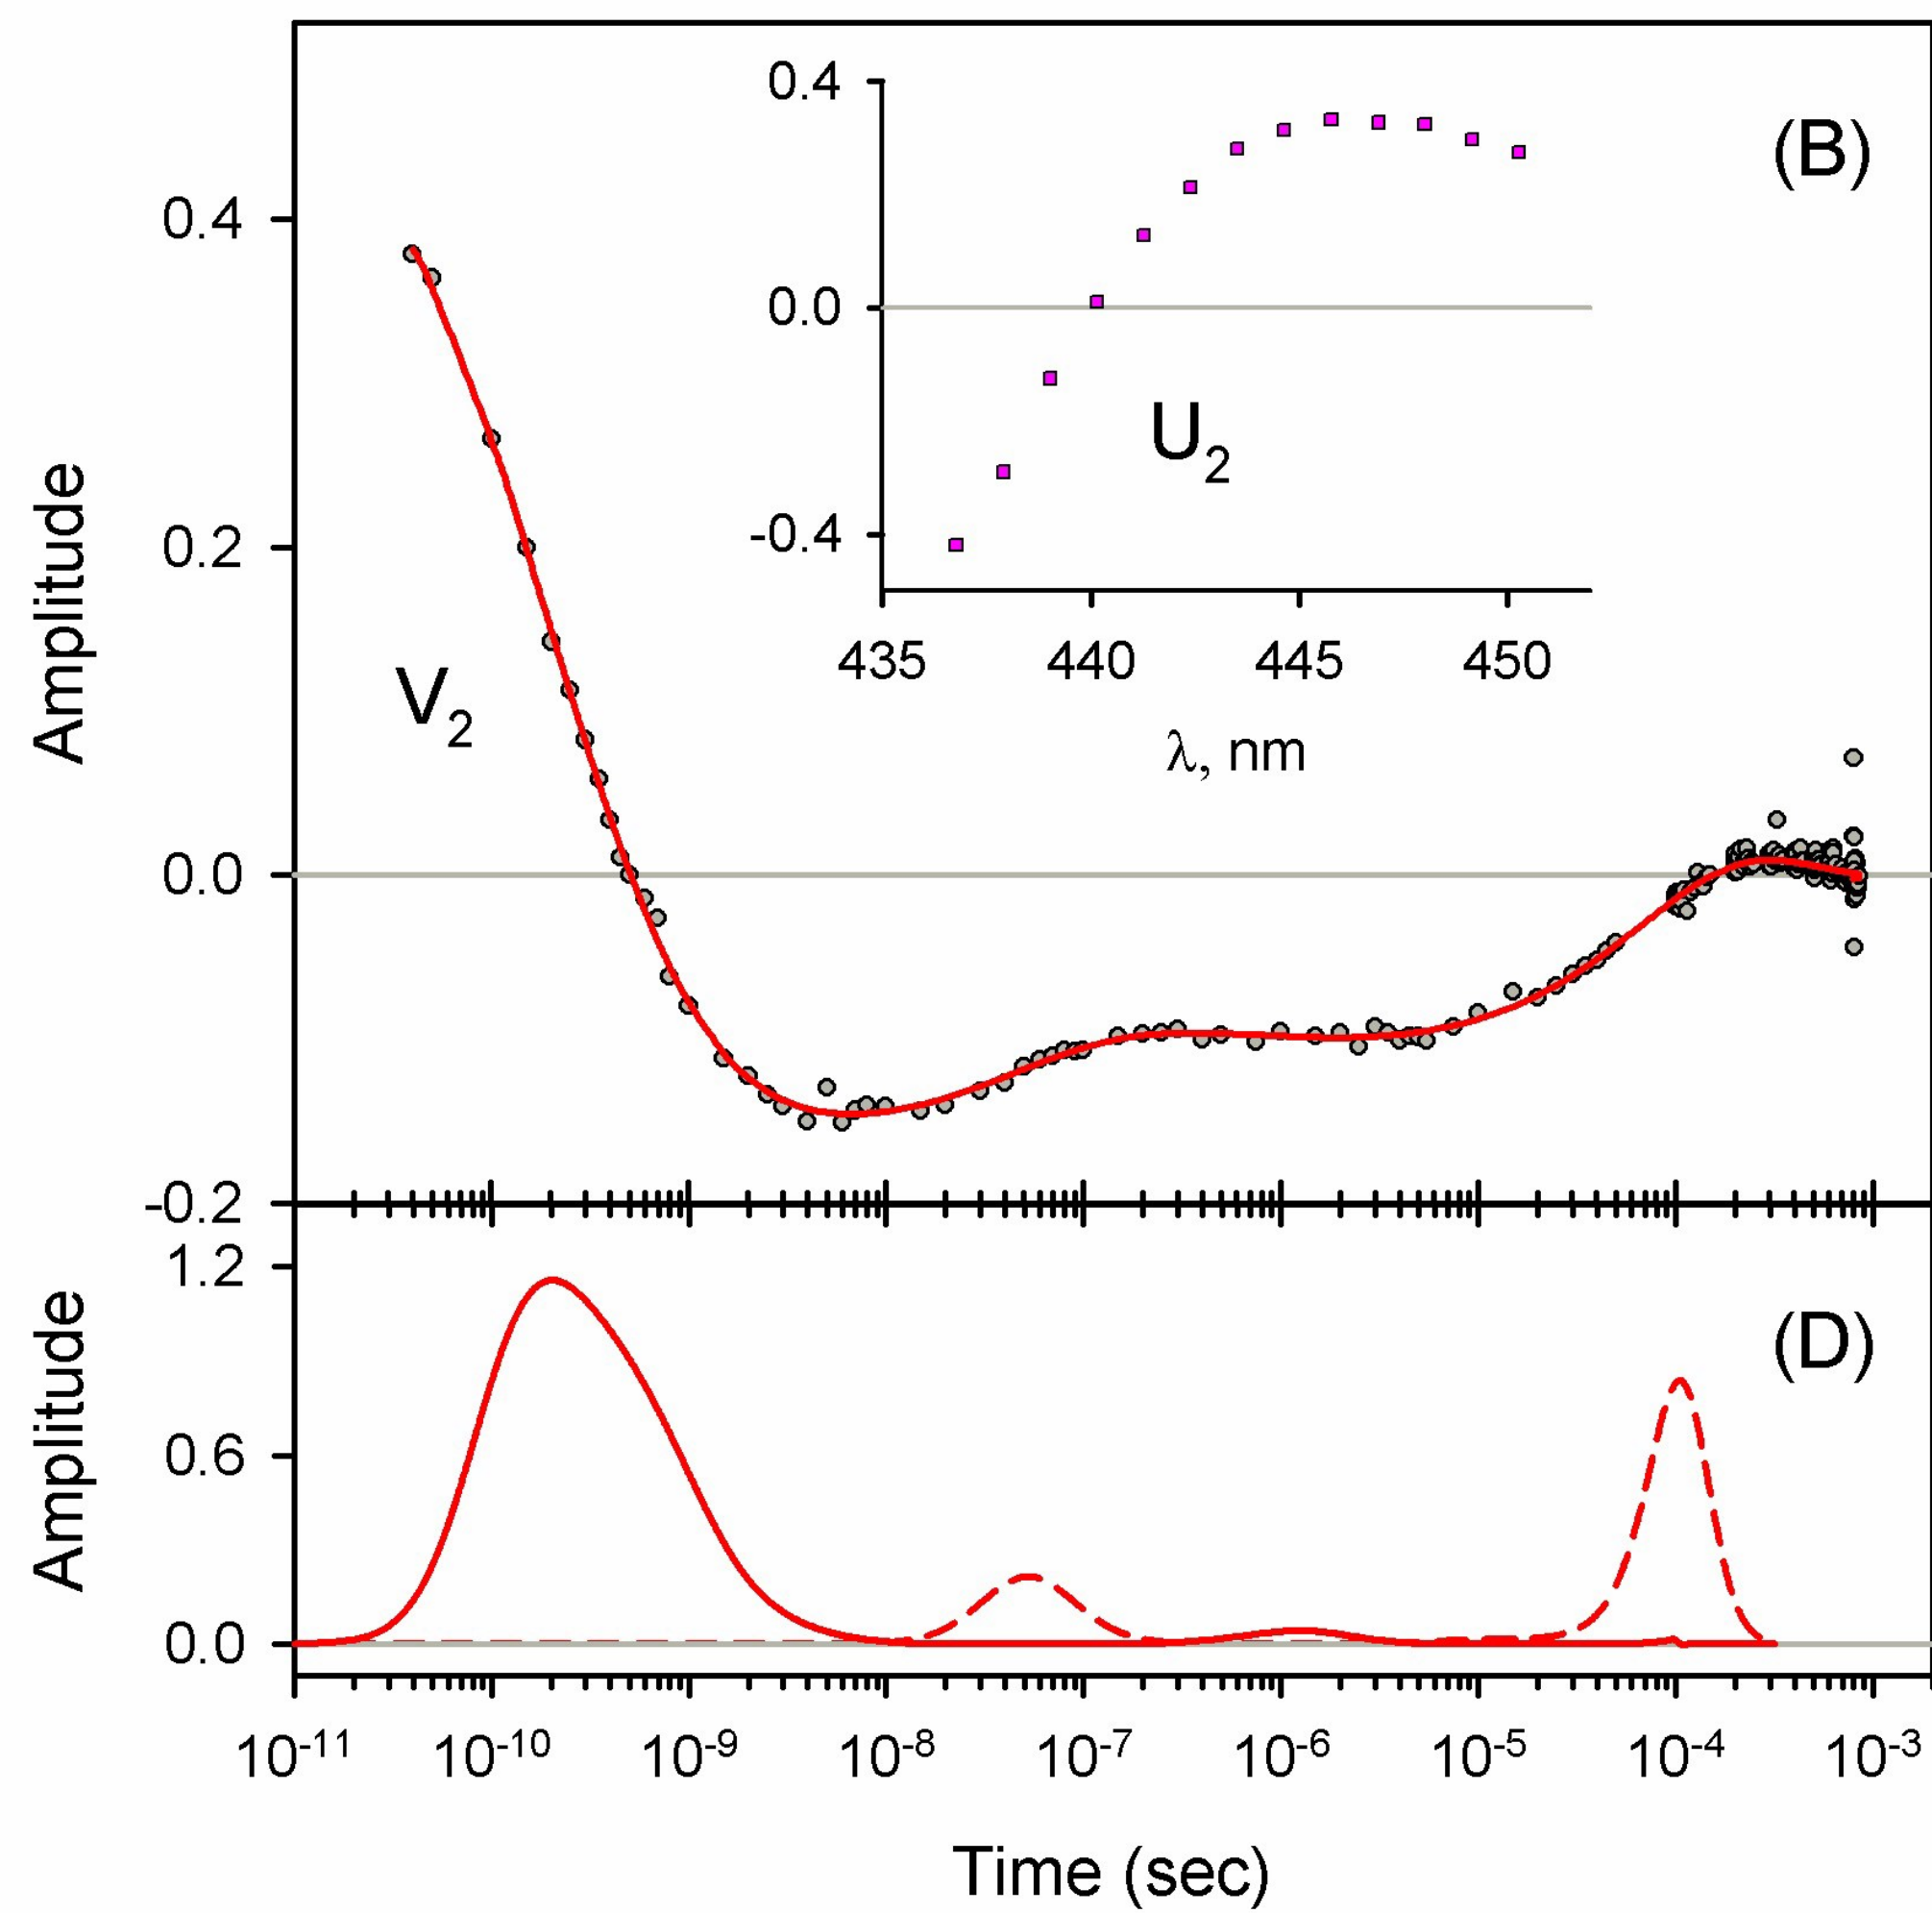

Supplement: d1sc00712b3.pdf [file d1sc00712b3.pdf]
